# Supplementary material for: Decorrelation scales for Arctic Ocean Hydrography. Part I: Amerasian Basin
Source: Copernicus journal article supplement (doi:10.5194/os-2017-70), 2017-09-06
Supplement: Supplementary file [file os-2017-70-AC2-supplement.pdf]

Reply to the review comments by anonymous reviewer #2.

We appreciate the anonymous reviewer #2 for reviewing our manuscript entitled "Decorrelation scales for Arctic Ocean Hydrography. Part I: Amerasian Basin".

Since the reviewer #2 did not raise additional points but assigned to refer the other review, we suppose that our point-by-point reply to the other review and the revised manuscript could provide response to (supposed) queries by reviewer #2.

Comments from the reviewer #2:

This is a nice manuscript, clearly presented and largely well-written. It is a technical piece on decorrelation scales in the Amerasian Basin of the Arctic Ocean, and as such, it's maybe not fascinating, but it will be useful, and I'm happy to recommend it for publication.

I cannot help but notice that the other review has trapped the queries that I had (rather more, in fact), so I will not repeat them here.

Thank you again for the review on our manuscript.
